# Supplementary material for: Motor Sequence Learning and Consolidation in Unilateral De Novo Patients with Parkinson’s Disease
Source: PubMed Central journal article supplement (PMC4519305; doi:10.1371/journal.pone.0134291), 2015-07-29
Supplement: pone.0134291.s001.pdf [file pone.0134291.s001.pdf]

Supporting Information

Supporting Table 1. Group means and SD for each block of the MSL task.

|                  | LH-S        | LH-A         | Controls     |
|------------------|-------------|--------------|--------------|
| <b>Session 1</b> |             |              |              |
| Block 1          | 1.73 (1.93) | 2.99 (2.49)  | 3.85 (3.17)  |
| Block 2          | 2.55 (1.81) | 4.73 (3.60)  | 6.16 (4.31)  |
| Block 3          | 3.53 (2.58) | 5.61 (3.90)  | 7.38 (4.95)  |
| Block 4          | 3.54 (2.60) | 6.15 (4.08)  | 8.03 (5.31)  |
| Block 5          | 3.71 (3.09) | 6.77 (4.11)  | 8.38 (5.48)  |
| Block 6          | 4.48 (3.08) | 6.92 (4.54)  | 9.30 (6.04)  |
| Block 7          | 5.00 (3.78) | 8.03 (5.66)  | 9.54 (5.92)  |
| Block 8          | 5.06 (3.22) | 7.75 (5.00)  | 10.35 (5.89) |
| Block 9          | 5.46 (4.35) | 7.91 (5.05)  | 10.97 (6.92) |
| Block 10         | 5.02 (3.99) | 8.31 (5.13)  | 10.00 (5.50) |
| Block 11         | 5.36 (3.49) | 8.66 (5.31)  | 10.72 (5.65) |
| Block 12         | 5.64 (3.54) | 9.61 (5.75)  | 11.17 (5.79) |
| Block 13         | 5.55 (3.23) | 9.21 (5.81)  | 11.23 (6.20) |
| Block 14         | 6.20 (4.22) | 8.83 (5.60)  | 11.79 (6.24) |
| <b>Session 2</b> |             |              |              |
| Block 1          | 5.25 (3.22) | 8.43 (4.98)  | 10.75 (6.10) |
| Block 2          | 6.22 (3.38) | 9.94 (5.65)  | 12.23 (6.17) |
| Block 3          | 6.86 (4.83) | 10.66 (5.58) | 13.04 (6.53) |
| Block 4          | 7.09 (3.91) | 11.07 (6.44) | 14.23 (6.48) |
| Block 5          | 6.29 (3.78) | 11.43 (6.22) | 14.51 (6.91) |
| Block 6          | 6.41 (3.68) | 11.40 (6.04) | 14.57 (6.37) |
| Block 7          | 6.64 (3.73) | 10.91 (5.35) | 13.99 (6.73) |
| Block 8          | 6.25 (3.45) | 10.66 (5.34) | 13.84 (6.22) |
| Block 9          | 6.42 (3.59) | 11.83 (5.50) | 13.47 (5.52) |
| Block 10         | 6.90 (3.62) | 11.65 (5.63) | 14.51 (6.74) |
| Block 11         | 7.18 (4.15) | 11.84 (6.27) | 15.25 (7.28) |
| Block 12         | 7.34 (4.00) | 12.22 (6.22) | 14.43 (6.33) |
| Block 13         | 7.56 (4.23) | 11.72 (5.97) | 14.81 (6.57) |
| Block 14         | 7.47 (3.75) | 12.05 (5.73) | 14.68 (6.33) |
